# Supplementary material for: CAR T-Cell Targeting of Macrophage Colony-Stimulating Factor Receptor
Source: MDPI journal article supplement (doi:10.3390/cells11142190), 2022-07-13
Supplement: s1 [file s1]

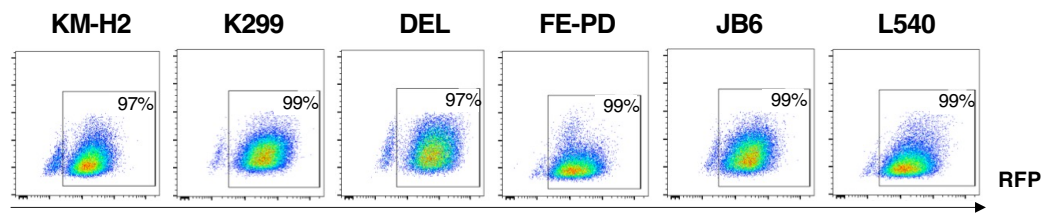

**Figure S1** Flow sorting of firefly luciferase and red fluorescent protein-expressing lymphoma cells. The indicated Hodgkin's lymphoma (KM-H2, L540) or anaplastic large cell lymphoma cell lines (K299, DEL, FE-PD, JB6) were transduced with the SFG ffLuc/RFP retroviral vector and were purified by flow sorting for RFP expression. Flow cytometric analysis for RFP expression is shown.

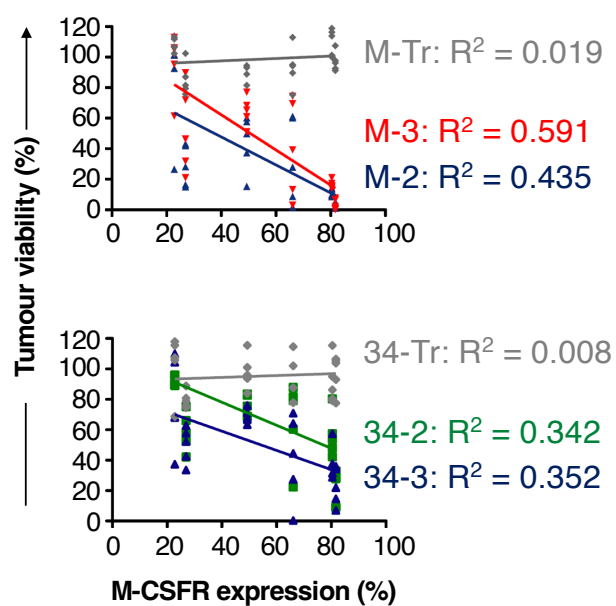

**Figure S2.** Correlation between cytolytic activity of M-CSFR-specific CAR T-cells and M-CSFR expression. CAR-engineered T-cells were co-cultured with Hodgkin's lymphoma (KM-H2, L540) or anaplastic large cell lymphoma cell lines (K299, DEL, FE-PD, JB6) for 72 hours, before cancer cell viability was quantified by luciferase assay. Graphs plot percentage tumour cell viability against percentage cell surface M-CSFR expression on each lymphoma cell line, as determined by flow cytometry. Data were obtained from a minimum of five independent experiments and each dot represents an individual sample measured for lymphoma cell viability. Correlation analysis was performed using simple linear regression analysis.

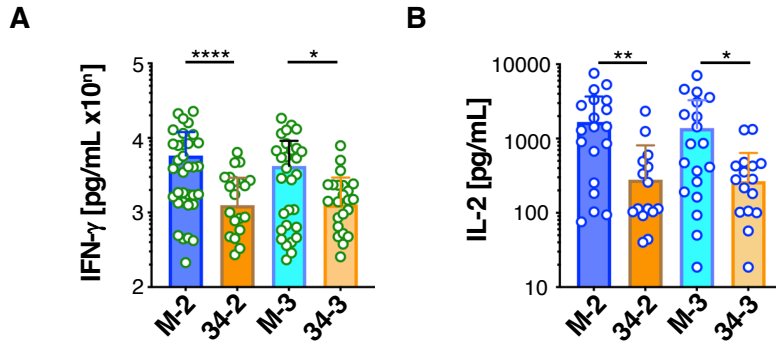

**Figure S3.** Pooled analysis of cytokine release by M-CSFR-specific CAR T-cells when cultured with lymphoma cells. Production of IFN- $\gamma$  (**A**) and IL-2 (**B**) by M-CSF and IL-34 containing 2G and 3G CAR T-cells has been pooled across all six Hodgkin's lymphoma (KM-H2, L540) or anaplastic large cell lymphoma cell lines (K299, DEL, FE-PD, JB6). Statistical analysis was performed using one-way ANOVA and significant differences are indicated. \*\*\*\* $p$ <0.0001; \*\*\* $p$ <0.001; \*\* $p$ <0.01; \* $p$ <0.05.
